# Supplementary material for: The role of serum Wisteria floribunda agglutinin-positive Mac-2 binding protein in the assessment of fibrosis in children with chronic hepatitis C
Source: Research Square preprint supplement (doi:10.21203/rs.3.rs-1087597/v1), 2021-12-02
Supplement: Supplementary file 1 [file 26d88da78d4debcf8eae81f6.xlsx]

## Sheet: Sheet1
Table 1. Baseline characteristics of HCV patients and control children
	HCV group	Control group
	(n=63)	(n=104)	P value
Sex (M/F)	26/37	44/60	NS
Age (years)	8 (1-17)	10 (4-17)	NS
Platelets (109/L)	27.2±6.2	29.7±6.1	P=0.013
Genotype
G1	27	/	NA
G2	36	/	NA
HCV-RNA (log IU/ml)	6.0±2.1	/	NA
AST (IU/L)	33.5±16.2	26.9±5.4	P<0.001
ALT (IU/L)	33.6±35.2	15.3±5.8	P<0.001
Fibrosis markers
APRI	0.43±0.24	0.31±0.09	P<0.001
FIB-4	0.19±0.08	0.25±0.09	P<0.001
M2BPGi	0.95±0.55	0.57±0.19	P<0.001
Pathology of the liver
Grade (A0/A1/A2/A3)	3/27/3/0	/	NA
Stage (F0/F1/F2/F3/F4)	9/22/2/0/0	/	NA
NS:not significant, NA:not applicable
